# Supplementary material for: Effects of Age, Gender, Health Status, and Political Party on COVID-19–Related Concerns and Prevention Behaviors: Results of a Large, Longitudinal Cross-sectional Survey
Source: PubMed Central journal article supplement (PMC8080961; doi:10.2196/24277), 2021-04-28
Supplement: publichealth_v7i4e24277_app2.pdf [file publichealth_v7i4e24277_app2.pdf]

## Appendix 2: Representativeness Table

| Variable         | Value                  | Target % | Unweighted N | Weighted % |
|------------------|------------------------|----------|--------------|------------|
| Age              | 18–23                  | 9.4      | 13653        | 9.4        |
|                  | 24–29                  | 10.9     | 13091        | 10.9       |
|                  | 30–39                  | 17.4     | 25668        | 17.4       |
|                  | 40–49                  | 16.3     | 23494        | 16.3       |
|                  | 50–59                  | 17       | 20785        | 17         |
|                  | 60–69                  | 15.2     | 19144        | 15.2       |
|                  | 70+                    | 13.8     | 9675         | 13.9       |
| Education        | No high school diploma | 11.6     | 11239        | 11.4       |
|                  | High school diploma    | 27.3     | 27064        | 27.3       |
|                  | Some college           | 21.9     | 25163        | 21.9       |
|                  | Associate’s degree     | 8.4      | 11239        | 8.4        |
|                  | Bachelor’s degree      | 19.3     | 34497        | 19.3       |
|                  | Graduate degree        | 11.5     | 16308        | 11.5       |
| Gender           | Male                   | 48.3     | 58591        | 48.3       |
|                  | Female                 | 51.7     | 66919        | 51.7       |
| Hispanic         | Not Hispanic           | 83.7     | 106311       | 83.8       |
|                  | Mexican                | 9.8      | 11341        | 9.8        |
|                  | Other Hispanic         | 6.5      | 7858         | 6.4        |
| Household Income | \$19,999 or less       | 9.7      | 23317        | 9.7        |
|                  | \$20,000–\$34,999      | 10.6     | 18730        | 10.6       |
|                  | \$35,000–\$49,999      | 10.9     | 14867        | 11         |
|                  | \$50,000–\$64,999      | 10.5     | 12994        | 10.5       |
|                  | \$65,000–\$79,999      | 9.2      | 10567        | 9.2        |
|                  | \$80,000–\$99,999      | 10.4     | 9081         | 10.4       |
|                  | \$100,000–\$124,999    | 10.1     | 10177        | 10.1       |
|                  | \$125,000–\$199,999    | 14.6     | 13648        | 14.6       |
|                  | \$200,000 and above    | 9.1      | 5903         | 9.1        |
|                  | Unanswered             | 4.9      | 6226         | 4.9        |

|              |            |      |       |      |
|--------------|------------|------|-------|------|
|              | White      | 74.1 | 94098 | 74.1 |
|              | Black      | 12.1 | 14344 | 12.1 |
| Race         | AAPI       | 6.9  | 7089  | 6.9  |
|              | Other race | 7    | 9979  | 7    |
|              | Midwest    | 20.8 | 27505 | 20.7 |
|              | Northeast  | 17.4 | 23178 | 17.9 |
| Region       | South      | 37.9 | 46515 | 38   |
|              | West       | 23.8 | 28312 | 23.4 |
|              | Clinton    | 27.7 | 39425 | 27.7 |
|              | Trump      | 26.5 | 43432 | 26.5 |
| Vote in 2016 | Other vote | 3.3  | 7584  | 3.3  |
|              | No vote    | 42.5 | 35069 | 42.5 |
