# Supplementary material for: Effects of Age, Gender, Health Status, and Political Party on COVID-19–Related Concerns and Prevention Behaviors: Results of a Large, Longitudinal Cross-sectional Survey
Source: PubMed Central journal article supplement (PMC8080961; doi:10.2196/24277), 2021-04-28
Supplement: publichealth_v7i4e24277_app3.pdf [file publichealth_v7i4e24277_app3.pdf]

### Appendix 3: Difference-in-Means Tests

Appendix 3a: Difference in Means over time for willingness to send children to school

| Dependent Variable | IV Name | IV Value    | Weighted Difference-in-Means |
|--------------------|---------|-------------|------------------------------|
| Child to School    | Overall | Overall     | 0.075***<br>[0.045, 0.104]   |
|                    |         | 18-39       | 0.086***<br>[0.038, 0.134]   |
|                    | Age     | 40-64       | 0.101***<br>[0.057, 0.145]   |
|                    |         | 65+         | -0.002<br>[-0.075, 0.071]    |
|                    |         | Female      | 0.098***<br>[0.057, 0.139]   |
|                    | Gender  | Male        | 0.05*<br>[0.007, 0.093]      |
|                    |         | Democrat    | 0.026<br>[-0.018, 0.071]     |
|                    | Party   | Independent | 0.06<br>[-0.019, 0.14]       |
|                    |         | Republican  | 0.136***<br>[0.091, 0.182]   |

Appendix 3b: Difference in Means over time for willingness to visit a dentist

| Dependent Variable | IV Name | IV Value    | Weighted Difference-in-Means |
|--------------------|---------|-------------|------------------------------|
| Dentist            | Overall | Overall     | 0.084***<br>[0.058, 0.111]   |
|                    |         | 18-39       | 0.102***<br>[0.059, 0.146]   |
|                    | Age     | 40-64       | 0.075***<br>[0.035, 0.115]   |
|                    |         | 65+         | 0.073*<br>[0.009, 0.137]     |
|                    |         | Female      | 0.117***<br>[0.079, 0.154]   |
|                    | Gender  | Male        | 0.049*<br>[0.011, 0.088]     |
|                    |         | Democrat    | 0.091***<br>[0.05, 0.132]    |
|                    | Party   | Independent | 0.06<br>[-0.012, 0.132]      |
|                    |         | Republican  | 0.087***<br>[0.048, 0.127]   |
