# Supplementary material for: Effects of Age, Gender, Health Status, and Political Party on COVID-19–Related Concerns and Prevention Behaviors: Results of a Large, Longitudinal Cross-sectional Survey
Source: PubMed Central journal article supplement (PMC8080961; doi:10.2196/24277), 2021-04-28
Supplement: publichealth_v7i4e24277_app4.pdf [file publichealth_v7i4e24277_app4.pdf]

## Appendix 4: Reference categories for regressions

| Variable Name                    | Reference Category          |
|----------------------------------|-----------------------------|
| age_bucket                       | 40-64                       |
| gender                           | Female                      |
| race_ethnicity_c                 | White                       |
| pid7_collapsed                   | Democrat                    |
| education_c2                     | Some college                |
| religion_c                       | Other religious affiliation |
| is_evangelical                   | No                          |
| household_income_imputed_tercile | HH Income: 2nd Tercile      |
| household_income_missing         | Not Missing                 |
| extra_sick_you_c                 | Not Self                    |
| extra_sick_family_c              | COVID-19: Not Family        |
| extra_sick_work_c                | COVID-19: Not Work          |
| extra_sick_other_c               | COVID-19: Not Other         |
| extra_prescriptions_3_cat        | 0-3                         |
| news_sources_count               | 3-6 News Sources            |
| news_sources_social_media_flag   | Yes                         |
| covid_trend                      | Late Peak State             |
| wave_int                         | 11                          |
