# Supplementary material for: Effects of Age, Gender, Health Status, and Political Party on COVID-19–Related Concerns and Prevention Behaviors: Results of a Large, Longitudinal Cross-sectional Survey
Source: PubMed Central journal article supplement (PMC8080961; doi:10.2196/24277), 2021-04-28
Supplement: publichealth_v7i4e24277_app5.pdf [file publichealth_v7i4e24277_app5.pdf]

| level             | Very concerned about coronavirus | Cancelled travel plans for work or pleasure (Precaution) | Not left home for prolonged period? (Precaution) | Bought extra groceries or household supplies (Precaution) | Stopped visiting family or friends? (Precaution) | Washed hands more often? (Precaution) | Worn a mask? (Precaution) |
|-------------------|----------------------------------|----------------------------------------------------------|--------------------------------------------------|-----------------------------------------------------------|--------------------------------------------------|---------------------------------------|---------------------------|
|                   | 1.02<br>[0.91, 1.14]             | 0.78 ***<br>[0.7, 0.88]                                  | 2.69 ***<br>[2.36, 3.05]                         | 1.98 ***<br>[1.73, 2.27]                                  | 2.39 ***<br>[2.08, 2.74]                         | 5.83 ***<br>[4.82, 7.06]              | 3.82 ***<br>[2.91, 5.03]  |
| 40-64             | 1.52 ***<br>[1.46, 1.59]         | 0.89 ***<br>[0.85, 0.93]                                 | 0.82 ***<br>[0.78, 0.86]                         | 0.75 ***<br>[0.71, 0.8]                                   | 1.15 ***<br>[1.09, 1.21]                         | 1.2 ***<br>[1.12, 1.29]               | 1.37 ***<br>[1.23, 1.53]  |
| 65+               | 2.05 ***<br>[1.93, 2.18]         | 1.08 *<br>[1.01, 1.14]                                   | 1.18 ***<br>[1.1, 1.26]                          | 0.67 ***<br>[0.62, 0.72]                                  | 1.6 ***<br>[1.49, 1.73]                          | 1.81 ***<br>[1.62, 2.02]              | 2.38 ***<br>[2.02, 2.8]   |
| Late Peak State   | 0.83 ***<br>[0.79, 0.87]         | 1.1 ***<br>[1.05, 1.16]                                  | 0.93 **<br>[0.88, 0.98]                          | 0.87 ***<br>[0.82, 0.93]                                  | 0.79 ***<br>[0.74, 0.84]                         | 0.95<br>[0.87, 1.04]                  | 0.64 ***<br>[0.55, 0.73]  |
| Low Rate          | 0.81 ***<br>[0.74, 0.89]         | 1.13 **<br>[1.03, 1.24]                                  | 0.95<br>[0.86, 1.05]                             | 0.89 *<br>[0.79, 0.99]                                    | 0.76 ***<br>[0.68, 0.85]                         | 1.13<br>[0.96, 1.33]                  | 0.69 ***<br>[0.54, 0.87]  |
| College and above | 1.15 ***<br>[1.1, 1.21]          | 1.58 ***<br>[1.5, 1.67]                                  | 1.29 ***<br>[1.21, 1.37]                         | 1.11 ***<br>[1.04, 1.19]                                  | 1.53 ***<br>[1.43, 1.63]                         | 1.16 ***<br>[1.06, 1.28]              | 1.37 ***<br>[1.19, 1.57]  |
| Some college      | 0.93 ***<br>[0.89, 0.97]         | 1.12 ***<br>[1.07, 1.18]                                 | 1.04<br>[0.99, 1.09]                             | 0.93 *<br>[0.88, 0.99]                                    | 1.08 **<br>[1.02, 1.14]                          | 0.9 **<br>[0.84, 0.97]                | 0.93<br>[0.83, 1.03]      |
| 4+ Prescriptions  | 1.47 ***<br>[1.4, 1.54]          | 0.92 ***<br>[0.88, 0.97]                                 | 1.2 ***<br>[1.13, 1.27]                          | 0.98<br>[0.93, 1.04]                                      | 1.02<br>[0.96, 1.08]                             | 0.98<br>[0.9, 1.07]                   | 1.36 ***<br>[1.2, 1.55]   |
| COVID-19: Family  | 1.25 ***<br>[1.13, 1.37]         | 1.8 ***<br>[1.61, 2.01]                                  | 1.15 **<br>[1.03, 1.28]                          | 1.02<br>[0.89, 1.16]                                      | 1.5 ***<br>[1.33, 1.7]                           | 0.96<br>[0.8, 1.14]                   | 1.06<br>[0.85, 1.32]      |
| COVID-19: Other   | 1.29 ***<br>[1.24, 1.35]         | 1.61 ***<br>[1.53, 1.7]                                  | 1.52 ***<br>[1.44, 1.61]                         | 1.19 ***<br>[1.12, 1.26]                                  | 1.98 ***<br>[1.86, 2.12]                         | 1.7 ***<br>[1.55, 1.86]               | 1.86 ***<br>[1.64, 2.11]  |
| COVID-19: Work    | 1.45 ***<br>[1.36, 1.55]         | 1.3 ***<br>[1.21, 1.41]                                  | 0.84 ***<br>[0.78, 0.91]                         | 1.09 +<br>[0.99, 1.2]                                     | 1.12 **<br>[1.02, 1.23]                          | 1.24 ***<br>[1.09, 1.42]              | 1.46 ***<br>[1.22, 1.74]  |
| COVID-19: Self    | 1.24 ***<br>[1.12, 1.39]         | 0.29 ***<br>[0.26, 0.33]                                 | 0.89 *<br>[0.79, 1]                              | 1.04<br>[0.89, 1.21]                                      | 0.27 ***<br>[0.24, 0.3]                          | 1.02<br>[0.84, 1.25]                  | 0.65 ***<br>[0.52, 0.81]  |
| Male              | 0.73 ***<br>[0.7, 0.75]          | 0.93 ***<br>[0.89, 0.96]                                 | 0.64 ***<br>[0.62, 0.67]                         | 0.72 ***<br>[0.69, 0.75]                                  | 0.55 ***<br>[0.53, 0.58]                         | 0.71 ***<br>[0.66, 0.75]              | 0.74 ***<br>[0.67, 0.81]  |

|                                |                          |                          |                          |                          |                          |                          |                          |
|--------------------------------|--------------------------|--------------------------|--------------------------|--------------------------|--------------------------|--------------------------|--------------------------|
| HH Income: \$34,999 - \$79,999 | 0.97<br>[0.92, 1.03]     | 1.04<br>[0.99, 1.1]      | 1.03<br>[0.97, 1.09]     | 1.19 ***<br>[1.12, 1.27] | 1.26 ***<br>[1.18, 1.34] | 1.28 ***<br>[1.17, 1.4]  | 1.43 ***<br>[1.26, 1.63] |
| HH Income: \$79,999 and above  | 0.95 +<br>[0.9, 1]       | 1.33 ***<br>[1.26, 1.4]  | 1.17 ***<br>[1.1, 1.24]  | 1.28 ***<br>[1.19, 1.36] | 1.44 ***<br>[1.35, 1.53] | 1.18 ***<br>[1.08, 1.29] | 1.5 ***<br>[1.31, 1.71]  |
| HH Income Not Missing          | 0.94<br>[0.86, 1.03]     | 1.08<br>[0.98, 1.19]     | 1.05<br>[0.95, 1.17]     | 0.94<br>[0.84, 1.06]     | 0.84 ***<br>[0.76, 0.94] | 0.82 **<br>[0.71, 0.96]  | 0.86<br>[0.69, 1.07]     |
| Evangelical                    | 1.14 ***<br>[1.09, 1.19] | 0.97<br>[0.93, 1.02]     | 0.96<br>[0.92, 1.01]     | 1.11 ***<br>[1.05, 1.17] | 0.86 ***<br>[0.82, 0.91] | 1.14 ***<br>[1.06, 1.23] | 0.8 ***<br>[0.72, 0.89]  |
| 3-6 News Sources               | 1.49 ***<br>[1.43, 1.56] | 1.38 ***<br>[1.32, 1.45] | 1.33 ***<br>[1.26, 1.39] | 1.46 ***<br>[1.38, 1.54] | 1.41 ***<br>[1.34, 1.49] | 1.85 ***<br>[1.72, 1.99] | 1.56 ***<br>[1.4, 1.73]  |
| 7+ News Sources                | 2.37 ***<br>[2.23, 2.52] | 2.21 ***<br>[2.07, 2.37] | 1.48 ***<br>[1.38, 1.59] | 2.03 ***<br>[1.88, 2.2]  | 1.67 ***<br>[1.55, 1.81] | 2.13 ***<br>[1.91, 2.37] | 2.06 ***<br>[1.75, 2.43] |
| News from Social Media         | 1.02<br>[0.97, 1.06]     | 1.21 ***<br>[1.15, 1.26] | 1.13 ***<br>[1.08, 1.19] | 1.28 ***<br>[1.22, 1.35] | 1.22 ***<br>[1.16, 1.29] | 1.19 ***<br>[1.11, 1.28] | 0.95<br>[0.85, 1.06]     |
| Independent                    | 0.54 ***<br>[0.51, 0.57] | 0.75 ***<br>[0.71, 0.8]  | 0.73 ***<br>[0.69, 0.78] | 0.8 ***<br>[0.75, 0.86]  | 0.65 ***<br>[0.61, 0.69] | 0.59 ***<br>[0.54, 0.65] | 0.5 ***<br>[0.43, 0.57]  |
| Republican                     | 0.4 ***<br>[0.38, 0.42]  | 0.88 ***<br>[0.84, 0.92] | 0.66 ***<br>[0.62, 0.69] | 0.8 ***<br>[0.76, 0.84]  | 0.64 ***<br>[0.61, 0.68] | 0.59 ***<br>[0.55, 0.64] | 0.45 ***<br>[0.4, 0.5]   |
| Asian or Pacific Islander      | 1.48 ***<br>[1.38, 1.59] | 2.05 ***<br>[1.89, 2.23] | 1.43 ***<br>[1.31, 1.56] | 1.51 ***<br>[1.38, 1.66] | 1.3 ***<br>[1.19, 1.43]  | 1.25 ***<br>[1.1, 1.42]  | 2.1 ***<br>[1.71, 2.58]  |
| Black                          | 1.33 ***<br>[1.25, 1.42] | 1.23 ***<br>[1.15, 1.32] | 0.82 ***<br>[0.77, 0.88] | 1.5 ***<br>[1.38, 1.63]  | 0.84 ***<br>[0.78, 0.91] | 0.99<br>[0.88, 1.11]     | 1.22 *<br>[1.03, 1.44]   |
| Hispanic                       | 1.29 ***<br>[1.22, 1.36] | 1.63 ***<br>[1.53, 1.73] | 1.23 ***<br>[1.15, 1.31] | 1.4 ***<br>[1.31, 1.51]  | 1.31 ***<br>[1.21, 1.4]  | 1.11 *<br>[1, 1.23]      | 1.87 ***<br>[1.6, 2.2]   |
| Some other race                | 1.04<br>[0.91, 1.18]     | 1.26 ***<br>[1.09, 1.45] | 1.03<br>[0.88, 1.2]      | 1.3 ***<br>[1.09, 1.56]  | 0.94<br>[0.79, 1.1]      | 0.87<br>[0.7, 1.07]      | 0.88<br>[0.65, 1.2]      |
| Catholic                       | 1.35 ***<br>[1.25, 1.45] | 1.28 ***<br>[1.19, 1.39] | 0.96<br>[0.88, 1.05]     | 1.07<br>[0.98, 1.17]     | 1.1 *<br>[1, 1.21]       | 1.84 ***<br>[1.62, 2.09] | 1.41 ***<br>[1.15, 1.71] |
| Jewish                         | 1.72 ***<br>[1.51, 1.97] | 1.22 **<br>[1.06, 1.39]  | 1.05<br>[0.9, 1.22]      | 1.51 ***<br>[1.29, 1.78] | 1.14<br>[0.95, 1.36]     | 1.32 *<br>[1.04, 1.67]   | 2.54 ***<br>[1.54, 4.2]  |
| Mormon                         | 0.78 **<br>[0.65, 0.94]  | 1.12<br>[0.93, 1.35]     | 0.73 ***<br>[0.6, 0.88]  | 0.82 +<br>[0.66, 1.03]   | 0.88<br>[0.72, 1.09]     | 0.89<br>[0.68, 1.16]     | 0.73 +<br>[0.52, 1.03]   |

|                             |                          |                          |                          |                         |                          |                          |                        |
|-----------------------------|--------------------------|--------------------------|--------------------------|-------------------------|--------------------------|--------------------------|------------------------|
| Other religious affiliation | 1.14 ***<br>[1.07, 1.22] | 1.12 ***<br>[1.04, 1.2]  | 0.89 ***<br>[0.82, 0.96] | 1.04<br>[0.96, 1.13]    | 0.93<br>[0.86, 1.02]     | 1.2 ***<br>[1.07, 1.34]  | 1.11<br>[0.93, 1.32]   |
| Protestant                  | 1.04<br>[0.96, 1.12]     | 1.14 ***<br>[1.05, 1.24] | 0.96<br>[0.88, 1.05]     | 0.96<br>[0.87, 1.05]    | 1.07<br>[0.97, 1.19]     | 1.37 ***<br>[1.2, 1.57]  | 1.23 *<br>[1.01, 1.51] |
| 10                          | 0.79 ***<br>[0.73, 0.85] | 1.17 ***<br>[1.08, 1.27] | 1.16 ***<br>[1.07, 1.26] | NA<br>NA                | 1.12 **<br>[1.02, 1.23]  | 0.76 ***<br>[0.67, 0.87] | 1.16 *<br>[1.03, 1.3]  |
| 2                           | 1.35 ***<br>[1.25, 1.47] | 1.06<br>[0.97, 1.14]     | 1.59 ***<br>[1.46, 1.74] | 0.97<br>[0.89, 1.05]    | 1.53 ***<br>[1.4, 1.68]  | 1.27 ***<br>[1.09, 1.47] | NA<br>NA               |
| 3                           | 1.16 ***<br>[1.07, 1.25] | 1.31 ***<br>[1.21, 1.42] | 1.7 ***<br>[1.56, 1.86]  | 1.01<br>[0.93, 1.1]     | 2.15 ***<br>[1.95, 2.37] | 1.18 *<br>[1.02, 1.36]   | NA<br>NA               |
| 4                           | 1.22 ***<br>[1.13, 1.33] | 1.27 ***<br>[1.17, 1.38] | 1.94 ***<br>[1.77, 2.12] | 1.12 **<br>[1.03, 1.22] | 2.3 ***<br>[2.07, 2.54]  | 1.26 ***<br>[1.08, 1.46] | NA<br>NA               |
| 5                           | 1.06<br>[0.98, 1.15]     | 1.25 ***<br>[1.15, 1.36] | 1.73 ***<br>[1.58, 1.89] | 1.1 *<br>[1.01, 1.2]    | 1.91 ***<br>[1.73, 2.1]  | 1.05<br>[0.91, 1.21]     | NA<br>NA               |
| 6                           | 0.99<br>[0.91, 1.07]     | 1.22 ***<br>[1.12, 1.32] | 1.57 ***<br>[1.44, 1.71] | 1.02<br>[0.94, 1.11]    | 1.74 ***<br>[1.58, 1.91] | 0.84 **<br>[0.73, 0.96]  | NA<br>NA               |
| 7                           | 0.88 ***<br>[0.81, 0.95] | 1.29 ***<br>[1.19, 1.41] | 1.43 ***<br>[1.31, 1.56] | 1.09 *<br>[1, 1.18]     | 1.78 ***<br>[1.62, 1.96] | 0.83 **<br>[0.73, 0.96]  | NA<br>NA               |
| 8                           | 0.87 ***<br>[0.8, 0.95]  | 1.23 ***<br>[1.13, 1.35] | 1.31 ***<br>[1.19, 1.44] | NA<br>NA                | 1.39 ***<br>[1.25, 1.54] | 0.77 ***<br>[0.66, 0.89] | NA<br>NA               |
| 9                           | 0.63 ***<br>[0.59, 0.69] | 1.14 ***<br>[1.05, 1.24] | 1.1 *<br>[1.01, 1.2]     | NA<br>NA                | 1.17 ***<br>[1.07, 1.28] | 0.77 ***<br>[0.68, 0.88] | 1.06<br>[0.94, 1.19]   |

## Return Activities (Set 1)

| Variable Level    | Send your child to school (Return) | Go to church services (Return) | Go to a stadium concert (Return) | Go to the dentist (Return) | Dinner at friends if safe? (Return) | Fly on an airplane (Return) | Attend a funeral (Return) | Get a haircut (Return)   |
|-------------------|------------------------------------|--------------------------------|----------------------------------|----------------------------|-------------------------------------|-----------------------------|---------------------------|--------------------------|
|                   | 0.51 ***<br>[0.44, 0.6]            | 0.18 ***<br>[0.14, 0.21]       | 0.25 ***<br>[0.21, 0.31]         | 0.96<br>[0.84, 1.1]        | 1.36 ***<br>[1.18, 1.57]            | 0.3 ***<br>[0.26, 0.35]     | 1<br>[0.87, 1.15]         | 0.74 ***<br>[0.64, 0.85] |
| 40-64             | 0.96<br>[0.9, 1.02]                | 0.94 +<br>[0.89, 1]            | 0.82 ***<br>[0.77, 0.88]         | 0.97<br>[0.92, 1.03]       | 0.93 **<br>[0.88, 0.98]             | 0.87 ***<br>[0.82, 0.92]    | 0.9 ***<br>[0.85, 0.95]   | 1.01<br>[0.96, 1.07]     |
| 65+               | 0.93 +<br>[0.86, 1.01]             | 0.94<br>[0.86, 1.02]           | 0.41 ***<br>[0.37, 0.46]         | 0.88 ***<br>[0.82, 0.95]   | 0.78 ***<br>[0.72, 0.84]            | 0.75 ***<br>[0.69, 0.81]    | 0.66 ***<br>[0.61, 0.71]  | 1.01<br>[0.94, 1.09]     |
| Late Peak State   | 1.01<br>[0.94, 1.08]               | 0.89 ***<br>[0.83, 0.95]       | 0.87 ***<br>[0.8, 0.93]          | 1.1 ***<br>[1.04, 1.17]    | 1<br>[0.95, 1.07]                   | 0.97<br>[0.91, 1.04]        | 0.99<br>[0.93, 1.05]      | 1.02<br>[0.96, 1.08]     |
| Low Rate          | 1.1<br>[0.97, 1.25]                | 0.97<br>[0.85, 1.1]            | 0.86 *<br>[0.74, 1]              | 1.39 ***<br>[1.24, 1.56]   | 1.25 ***<br>[1.11, 1.41]            | 1.02<br>[0.9, 1.16]         | 1.12 *<br>[1, 1.26]       | 1.02<br>[0.91, 1.15]     |
| College and above | 1.19 ***<br>[1.11, 1.28]           | 0.99<br>[0.92, 1.06]           | 0.8 ***<br>[0.73, 0.86]          | 1.11 ***<br>[1.04, 1.19]   | 0.98<br>[0.92, 1.05]                | 1.11 ***<br>[1.03, 1.19]    | 0.81 ***<br>[0.76, 0.86]  | 1.01<br>[0.95, 1.08]     |
| Some college      | 1<br>[0.93, 1.07]                  | 1.05<br>[0.98, 1.12]           | 0.91 **<br>[0.84, 0.97]          | 1.09 ***<br>[1.03, 1.16]   | 1.1 ***<br>[1.04, 1.17]             | 1.01<br>[0.94, 1.07]        | 0.98<br>[0.92, 1.04]      | 1.02<br>[0.97, 1.09]     |
| 4+ Prescriptions  | 0.81 ***<br>[0.75, 0.87]           | 1<br>[0.93, 1.07]              | 0.93 +<br>[0.85, 1.01]           | 0.95 +<br>[0.9, 1.01]      | 0.83 ***<br>[0.78, 0.88]            | 0.82 ***<br>[0.77, 0.88]    | 0.96<br>[0.9, 1.02]       | 0.93 **<br>[0.87, 0.98]  |
| COVID-19: Family  | 1.23 ***<br>[1.1, 1.38]            | 1.12 +<br>[1, 1.26]            | 1.42 ***<br>[1.25, 1.6]          | 1.05<br>[0.94, 1.17]       | 1.27 ***<br>[1.14, 1.42]            | 1.34 ***<br>[1.19, 1.5]     | 1.23 ***<br>[1.1, 1.37]   | 1.14 *<br>[1.02, 1.27]   |
| COVID-19: Other   | 0.86 ***<br>[0.81, 0.91]           | 0.96<br>[0.9, 1.02]            | 0.71 ***<br>[0.67, 0.77]         | 0.95 +<br>[0.91, 1.01]     | 1.05 +<br>[0.99, 1.11]              | 0.84 ***<br>[0.79, 0.89]    | 1.02<br>[0.97, 1.08]      | 0.92 ***<br>[0.87, 0.97] |
| COVID-19: Work    | 1.03<br>[0.95, 1.12]               | 1.02<br>[0.94, 1.12]           | 1.13 **<br>[1.03, 1.24]          | 1.1 **<br>[1.02, 1.19]     | 0.97<br>[0.89, 1.05]                | 1.16 ***<br>[1.07, 1.26]    | 1.01<br>[0.93, 1.09]      | 1.12 **<br>[1.03, 1.21]  |
| COVID-19: Self    | 2.62 ***<br>[2.29, 3]              | 1.98 ***<br>[1.72, 2.27]       | 3.99 ***<br>[3.48, 4.58]         | 1.56 ***<br>[1.36, 1.78]   | 1.27 ***<br>[1.11, 1.45]            | 2.78 ***<br>[2.44, 3.17]    | 1.39 ***<br>[1.22, 1.59]  | 1.39 ***<br>[1.22, 1.59] |
| Male              | 1.37 ***<br>[1.3, 1.45]            | 1.29 ***<br>[1.22, 1.36]       | 1.7 ***<br>[1.6, 1.81]           | 1.2 ***<br>[1.15, 1.26]    | 1.13 ***<br>[1.08, 1.19]            | 1.51 ***<br>[1.43, 1.59]    | 1.22 ***<br>[1.16, 1.27]  | 1.29 ***<br>[1.23, 1.35] |
|                   | 0.97                               | 0.91 *                         | 0.8 ***                          | 1.08 *                     | 1.04                                | 0.91 *                      | 1.03                      | 1.15 ***                 |

|                                |                          |                          |                          |                          |                          |                          |                          |                          |
|--------------------------------|--------------------------|--------------------------|--------------------------|--------------------------|--------------------------|--------------------------|--------------------------|--------------------------|
| HH Income: \$34,999 - \$79,999 | [0.89, 1.05]             | [0.84, 0.99]             | [0.73, 0.88]             | [1.01, 1.16]             | [0.97, 1.12]             | [0.84, 0.98]             | [0.97, 1.11]             | [1.07, 1.24]             |
| HH Income: \$79,999 and above  | 1.26 ***<br>[1.16, 1.36] | 0.98<br>[0.91, 1.06]     | 0.9 *<br>[0.83, 0.99]    | 1.29 ***<br>[1.2, 1.38]  | 1.16 ***<br>[1.08, 1.24] | 1.19 ***<br>[1.1, 1.28]  | 1.25 ***<br>[1.17, 1.35] | 1.4 ***<br>[1.3, 1.5]    |
| HH Income Not Missing          | 0.97<br>[0.85, 1.11]     | 1.22 ***<br>[1.08, 1.39] | 1.02<br>[0.88, 1.18]     | 1.02<br>[0.91, 1.14]     | 1.05<br>[0.94, 1.18]     | 1.13 +<br>[1, 1.29]      | 1.12 *<br>[1, 1.26]      | 1.05<br>[0.94, 1.17]     |
| Evangelical                    | 1.18 ***<br>[1.11, 1.26] | 2.07 ***<br>[1.95, 2.19] | 1.5 ***<br>[1.4, 1.6]    | 0.93 **<br>[0.88, 0.98]  | 0.99<br>[0.93, 1.05]     | 1.21 ***<br>[1.14, 1.29] | 1.13 ***<br>[1.06, 1.19] | 1.07 *<br>[1.01, 1.13]   |
| 3-6 News Sources               | 0.83 ***<br>[0.78, 0.89] | 0.85 ***<br>[0.8, 0.91]  | 0.84 ***<br>[0.78, 0.91] | 0.92 ***<br>[0.87, 0.97] | 0.99<br>[0.93, 1.05]     | 0.88 ***<br>[0.82, 0.94] | 0.92 ***<br>[0.87, 0.97] | 0.97<br>[0.91, 1.02]     |
| 7+ News Sources                | 0.9 *<br>[0.83, 0.98]    | 0.93<br>[0.86, 1.02]     | 1.14 **<br>[1.03, 1.25]  | 0.92 *<br>[0.85, 0.99]   | 0.84 ***<br>[0.78, 0.91] | 0.99<br>[0.91, 1.08]     | 0.87 ***<br>[0.8, 0.94]  | 0.89 ***<br>[0.82, 0.96] |
| News from Social Media         | 1.03<br>[0.97, 1.1]      | 1.11 ***<br>[1.05, 1.18] | 1.17 ***<br>[1.09, 1.26] | 0.96<br>[0.91, 1.02]     | 1.16 ***<br>[1.1, 1.23]  | 1.15 ***<br>[1.08, 1.22] | 1.12 ***<br>[1.06, 1.19] | 1.08 **<br>[1.02, 1.15]  |
| Independent                    | 1.21 ***<br>[1.11, 1.31] | 1.26 ***<br>[1.17, 1.37] | 1.57 ***<br>[1.43, 1.72] | 1.14 ***<br>[1.06, 1.22] | 1.3 ***<br>[1.21, 1.39]  | 1.27 ***<br>[1.18, 1.38] | 1.23 ***<br>[1.14, 1.32] | 1.28 ***<br>[1.19, 1.37] |
| Republican                     | 1.7 ***<br>[1.6, 1.81]   | 2.22 ***<br>[2.09, 2.36] | 2 ***<br>[1.87, 2.15]    | 1.54 ***<br>[1.46, 1.63] | 1.82 ***<br>[1.72, 1.92] | 1.77 ***<br>[1.67, 1.88] | 1.7 ***<br>[1.61, 1.79]  | 1.78 ***<br>[1.68, 1.88] |
| Asian or Pacific Islander      | 0.86 ***<br>[0.78, 0.95] | 0.68 ***<br>[0.61, 0.75] | 0.57 ***<br>[0.51, 0.64] | 0.58 ***<br>[0.54, 0.64] | 0.58 ***<br>[0.53, 0.63] | 0.84 ***<br>[0.76, 0.92] | 0.57 ***<br>[0.52, 0.62] | 0.61 ***<br>[0.56, 0.66] |
| Black                          | 0.74 ***<br>[0.67, 0.81] | 1.01<br>[0.92, 1.1]      | 0.87 **<br>[0.78, 0.97]  | 0.71 ***<br>[0.66, 0.77] | 0.52 ***<br>[0.48, 0.57] | 0.93<br>[0.85, 1.02]     | 0.58 ***<br>[0.54, 0.63] | 0.53 ***<br>[0.49, 0.58] |
| Hispanic                       | 0.81 ***<br>[0.74, 0.87] | 0.71 ***<br>[0.66, 0.77] | 0.81 ***<br>[0.74, 0.89] | 0.79 ***<br>[0.73, 0.85] | 0.68 ***<br>[0.63, 0.73] | 0.87 ***<br>[0.81, 0.95] | 0.56 ***<br>[0.53, 0.61] | 0.75 ***<br>[0.7, 0.81]  |
| Some other race                | 0.76 **<br>[0.62, 0.93]  | 0.7 ***<br>[0.57, 0.87]  | 0.68 ***<br>[0.54, 0.86] | 0.73 ***<br>[0.62, 0.86] | 0.65 ***<br>[0.55, 0.77] | 0.97<br>[0.81, 1.17]     | 0.64 ***<br>[0.54, 0.76] | 0.72 ***<br>[0.61, 0.86] |
| Catholic                       | 0.97<br>[0.87, 1.09]     | 3.36 ***<br>[2.87, 3.95] | 1.14 *<br>[1.01, 1.3]    | 1.05<br>[0.96, 1.15]     | 0.9 *<br>[0.82, 0.99]    | 1<br>[0.9, 1.11]         | 1.19 ***<br>[1.08, 1.3]  | 1.24 ***<br>[1.13, 1.36] |
| Jewish                         | 1.04<br>[0.86, 1.26]     | 2.16 ***<br>[1.73, 2.7]  | 1.26 *<br>[1.02, 1.57]   | 1.13<br>[0.96, 1.32]     | 0.89<br>[0.76, 1.04]     | 1.05<br>[0.88, 1.25]     | 1.14<br>[0.97, 1.33]     | 1.1<br>[0.93, 1.29]      |
| Mormon                         | 1.31 *<br>[1.02, 1.68]   | 6.31 ***<br>[4.82, 8.25] | 0.88<br>[0.66, 1.18]     | 1.41 ***<br>[1.11, 1.78] | 1.29 *<br>[1.01, 1.66]   | 0.98<br>[0.77, 1.25]     | 1.73 ***<br>[1.37, 2.19] | 1.29 *<br>[1.02, 1.63]   |
|                                | 0.85 ***                 | 2.58 ***                 | 1.19 **                  | 1.04                     | 0.95                     | 1.02                     | 1.13 **                  | 1.16 ***                 |

|                             |                          |                          |                          |                          |                        |                         |                          |                          |
|-----------------------------|--------------------------|--------------------------|--------------------------|--------------------------|------------------------|-------------------------|--------------------------|--------------------------|
| Other religious affiliation | [0.76, 0.94]             | [2.21, 3.02]             | [1.05, 1.33]             | [0.95, 1.13]             | [0.87, 1.04]           | [0.92, 1.12]            | [1.04, 1.24]             | [1.06, 1.27]             |
| Protestant                  | 0.97<br>[0.86, 1.09]     | 3.25 ***<br>[2.75, 3.82] | 0.97<br>[0.85, 1.12]     | 1.15 **<br>[1.04, 1.27]  | 1.09<br>[0.98, 1.2]    | 0.85 **<br>[0.76, 0.95] | 1.24 ***<br>[1.12, 1.37] | 1.35 ***<br>[1.22, 1.49] |
| 10                          | 0.93<br>[0.85, 1.02]     | 1.02<br>[0.93, 1.11]     | 1<br>[0.9, 1.1]          | 1.16 ***<br>[1.07, 1.25] | 1.04<br>[0.96, 1.13]   | 1.01<br>[0.92, 1.1]     | 0.87 ***<br>[0.81, 0.95] | 1.1 *<br>[1.02, 1.2]     |
| 6                           | 0.91 *<br>[0.83, 0.99]   | 0.87 ***<br>[0.79, 0.95] | 0.82 ***<br>[0.74, 0.91] | 0.97<br>[0.9, 1.05]      | 0.93 +<br>[0.86, 1.01] | 0.94<br>[0.86, 1.02]    | 0.84 ***<br>[0.78, 0.91] | 0.94<br>[0.87, 1.02]     |
| 7                           | 0.85 ***<br>[0.78, 0.93] | 0.88 **<br>[0.81, 0.96]  | 0.96<br>[0.87, 1.07]     | 0.97<br>[0.89, 1.04]     | 0.95<br>[0.88, 1.03]   | 1.01<br>[0.93, 1.11]    | 0.88 ***<br>[0.81, 0.95] | 0.95<br>[0.87, 1.02]     |
| 8                           | 0.95<br>[0.87, 1.05]     | 0.95<br>[0.86, 1.04]     | 1.04<br>[0.94, 1.16]     | 1.08 +<br>[0.99, 1.18]   | 0.94<br>[0.86, 1.03]   | 1.12 *<br>[1.02, 1.23]  | 0.9 *<br>[0.83, 0.98]    | 0.94<br>[0.86, 1.03]     |
| 9                           | 1.02<br>[0.93, 1.11]     | 0.95<br>[0.87, 1.04]     | 0.94<br>[0.85, 1.04]     | 1.11 **<br>[1.02, 1.2]   | 1.02<br>[0.94, 1.1]    | 1.03<br>[0.94, 1.12]    | 0.94<br>[0.87, 1.02]     | 1.04<br>[0.96, 1.12]     |

## Return Activities (Set 2)

| Variable Level    | Go to the movies<br>(Return) | Ride on public transportation<br>(Return) | Eat at restaurant if safe?<br>(Return) | Return to school yourself<br>(Return) | Shop if safe?<br>(Return) | Attend a professional sporting event<br>(Return) | Attend a wedding reception<br>(Return) |
|-------------------|------------------------------|-------------------------------------------|----------------------------------------|---------------------------------------|---------------------------|--------------------------------------------------|----------------------------------------|
|                   | 0.39 ***<br>[0.33, 0.46]     | 0.4 ***<br>[0.34, 0.48]                   | 0.83 **<br>[0.73, 0.95]                | 0.52 ***<br>[0.44, 0.61]              | 0.49 ***<br>[0.42, 0.56]  | 0.21 ***<br>[0.17, 0.25]                         | 0.52 ***<br>[0.45, 0.6]                |
| 40-64             | 0.8 ***<br>[0.75, 0.85]      | 0.89 ***<br>[0.83, 0.95]                  | 0.88 ***<br>[0.83, 0.93]               | 0.68 ***<br>[0.64, 0.73]              | 0.9 ***<br>[0.85, 0.95]   | 0.83 ***<br>[0.77, 0.88]                         | 0.84 ***<br>[0.8, 0.89]                |
| 65+               | 0.54 ***<br>[0.49, 0.59]     | 0.62 ***<br>[0.56, 0.68]                  | 0.73 ***<br>[0.68, 0.79]               | 0.48 ***<br>[0.44, 0.53]              | 0.81 ***<br>[0.75, 0.87]  | 0.47 ***<br>[0.42, 0.52]                         | 0.67 ***<br>[0.63, 0.73]               |
| Late Peak State   | 1.01<br>[0.94, 1.08]         | 0.72 ***<br>[0.67, 0.78]                  | 0.99<br>[0.94, 1.05]                   | 1.01<br>[0.94, 1.08]                  | 0.97<br>[0.91, 1.03]      | 0.9 **<br>[0.84, 0.97]                           | 0.93 *<br>[0.88, 0.99]                 |
| Low Rate          | 1.01<br>[0.89, 1.15]         | 0.78 ***<br>[0.67, 0.89]                  | 0.98<br>[0.87, 1.1]                    | 1.14 +<br>[0.99, 1.31]                | 1.06<br>[0.95, 1.19]      | 0.96<br>[0.83, 1.11]                             | 1.07<br>[0.96, 1.21]                   |
| College and above | 0.77 ***<br>[0.72, 0.83]     | 0.93 +<br>[0.85, 1]                       | 0.89 ***<br>[0.83, 0.95]               | 1.03<br>[0.95, 1.11]                  | 0.89 ***<br>[0.83, 0.95]  | 0.83 ***<br>[0.76, 0.9]                          | 0.96<br>[0.9, 1.02]                    |
| Some college      | 0.87 ***<br>[0.82, 0.93]     | 0.88 ***<br>[0.81, 0.94]                  | 0.97<br>[0.92, 1.03]                   | 1.05<br>[0.98, 1.13]                  | 0.97<br>[0.92, 1.03]      | 0.93 +<br>[0.87, 1]                              | 0.98<br>[0.92, 1.04]                   |
| 4+ Prescriptions  | 0.9 ***<br>[0.84, 0.97]      | 0.8 ***<br>[0.74, 0.87]                   | 0.94 *<br>[0.89, 1]                    | 0.75 ***<br>[0.69, 0.81]              | 0.95 +<br>[0.89, 1.01]    | 0.89 ***<br>[0.82, 0.96]                         | 0.95 +<br>[0.89, 1.01]                 |
| COVID-19: Family  | 1.42 ***<br>[1.26, 1.59]     | 1.5 ***<br>[1.34, 1.69]                   | 1.3 ***<br>[1.17, 1.44]                | 1.34 ***<br>[1.19, 1.51]              | 1.28 ***<br>[1.15, 1.43]  | 1.35 ***<br>[1.19, 1.53]                         | 1.34 ***<br>[1.21, 1.5]                |
| COVID-19: Other   | 0.81 ***<br>[0.76, 0.86]     | 0.77 ***<br>[0.72, 0.83]                  | 0.85 ***<br>[0.8, 0.89]                | 0.93 *<br>[0.87, 0.99]                | 0.74 ***<br>[0.7, 0.78]   | 0.76 ***<br>[0.71, 0.81]                         | 0.89 ***<br>[0.85, 0.94]               |
| COVID-19: Work    | 1.05<br>[0.97, 1.14]         | 1.16 ***<br>[1.06, 1.27]                  | 1.02<br>[0.95, 1.1]                    | 0.99<br>[0.9, 1.08]                   | 1.07 +<br>[0.99, 1.16]    | 1.08 +<br>[0.99, 1.19]                           | 1.05<br>[0.97, 1.13]                   |
| COVID-19: Self    | 2.88 ***<br>[2.52, 3.28]     | 3.09 ***<br>[2.7, 3.54]                   | 1.81 ***<br>[1.59, 2.06]               | 2.57 ***<br>[2.24, 2.95]              | 2.36 ***<br>[2.07, 2.68]  | 3.52 ***<br>[3.07, 4.04]                         | 1.99 ***<br>[1.75, 2.26]               |
| Male              | 1.59 ***<br>[1.51, 1.68]     | 1.89 ***<br>[1.78, 2]                     | 1.44 ***<br>[1.37, 1.51]               | 1.31 ***<br>[1.23, 1.38]              | 1.51 ***<br>[1.44, 1.58]  | 2 ***<br>[1.88, 2.12]                            | 1.28 ***<br>[1.22, 1.34]               |

|                                |                          |                          |                          |                          |                          |                          |                          |
|--------------------------------|--------------------------|--------------------------|--------------------------|--------------------------|--------------------------|--------------------------|--------------------------|
| HH Income: \$34,999 - \$79,999 | 0.93 +<br>[0.86, 1]      | 0.65 ***<br>[0.59, 0.7]  | 0.94 +<br>[0.88, 1.01]   | 0.87 ***<br>[0.8, 0.94]  | 0.96<br>[0.89, 1.03]     | 0.85 ***<br>[0.78, 0.93] | 1.03<br>[0.96, 1.11]     |
| HH Income: \$79,999 and above  | 1.05<br>[0.97, 1.14]     | 0.73 ***<br>[0.67, 0.79] | 1.08 *<br>[1, 1.15]      | 1.21 ***<br>[1.11, 1.31] | 1.02<br>[0.95, 1.09]     | 1.01<br>[0.92, 1.1]      | 1.14 ***<br>[1.06, 1.22] |
| HH Income Not Missing          | 1.1<br>[0.97, 1.24]      | 1.14 +<br>[0.99, 1.32]   | 1.04<br>[0.93, 1.16]     | 1.25 ***<br>[1.1, 1.43]  | 1.05<br>[0.94, 1.18]     | 1.06<br>[0.91, 1.23]     | 0.96<br>[0.85, 1.08]     |
| Evangelical                    | 1.37 ***<br>[1.29, 1.46] | 1.4 ***<br>[1.31, 1.5]   | 1.21 ***<br>[1.15, 1.28] | 1.2 ***<br>[1.13, 1.29]  | 1.27 ***<br>[1.2, 1.35]  | 1.36 ***<br>[1.28, 1.46] | 1.24 ***<br>[1.17, 1.32] |
| 3-6 News Sources               | 0.78 ***<br>[0.73, 0.83] | 0.93 +<br>[0.86, 1]      | 0.87 ***<br>[0.82, 0.92] | 0.96<br>[0.89, 1.03]     | 0.92 **<br>[0.87, 0.98]  | 0.82 ***<br>[0.76, 0.88] | 0.82 ***<br>[0.77, 0.87] |
| 7+ News Sources                | 0.98<br>[0.9, 1.06]      | 1.35 ***<br>[1.23, 1.48] | 0.88 ***<br>[0.82, 0.95] | 0.99<br>[0.91, 1.09]     | 1.12 ***<br>[1.04, 1.21] | 1.09 +<br>[0.99, 1.19]   | 0.87 ***<br>[0.81, 0.95] |
| News from Social Media         | 1.14 ***<br>[1.07, 1.22] | 1.07 +<br>[1, 1.15]      | 1.07 **<br>[1.02, 1.13]  | 1.21 ***<br>[1.12, 1.29] | 1.06 *<br>[1, 1.12]      | 1.23 ***<br>[1.15, 1.32] | 1.14 ***<br>[1.07, 1.2]  |
| Independent                    | 1.42 ***<br>[1.31, 1.54] | 1.25 ***<br>[1.15, 1.37] | 1.37 ***<br>[1.28, 1.47] | 1.05<br>[0.96, 1.15]     | 1.32 ***<br>[1.22, 1.41] | 1.41 ***<br>[1.29, 1.55] | 1.36 ***<br>[1.26, 1.46] |
| Republican                     | 1.79 ***<br>[1.69, 1.9]  | 1.55 ***<br>[1.45, 1.66] | 2.03 ***<br>[1.92, 2.14] | 1.55 ***<br>[1.46, 1.66] | 1.8 ***<br>[1.71, 1.9]   | 1.96 ***<br>[1.83, 2.09] | 2.02 ***<br>[1.91, 2.13] |
| Asian or Pacific Islander      | 0.65 ***<br>[0.59, 0.73] | 0.86 **<br>[0.77, 0.96]  | 0.75 ***<br>[0.68, 0.81] | 0.87 **<br>[0.78, 0.96]  | 0.88 ***<br>[0.8, 0.96]  | 0.52 ***<br>[0.46, 0.59] | 0.64 ***<br>[0.59, 0.71] |
| Black                          | 0.86 ***<br>[0.78, 0.94] | 1.27 ***<br>[1.16, 1.4]  | 0.66 ***<br>[0.6, 0.71]  | 0.8 ***<br>[0.73, 0.88]  | 0.93 +<br>[0.85, 1.01]   | 0.9 *<br>[0.81, 1]       | 0.73 ***<br>[0.67, 0.8]  |
| Hispanic                       | 0.82 ***<br>[0.75, 0.88] | 1.13 **<br>[1.04, 1.23]  | 0.72 ***<br>[0.67, 0.77] | 0.86 ***<br>[0.8, 0.94]  | 0.87 ***<br>[0.81, 0.94] | 0.81 ***<br>[0.74, 0.88] | 0.61 ***<br>[0.57, 0.66] |
| Some other race                | 0.83 +<br>[0.68, 1.01]   | 1.2 +<br>[0.98, 1.48]    | 0.81 **<br>[0.68, 0.96]  | 0.77 **<br>[0.63, 0.95]  | 1.02<br>[0.86, 1.21]     | 0.75 **<br>[0.6, 0.94]   | 0.78 **<br>[0.65, 0.93]  |
| Catholic                       | 1.07<br>[0.96, 1.19]     | 0.87 *<br>[0.77, 0.98]   | 0.97<br>[0.89, 1.07]     | 0.92<br>[0.82, 1.03]     | 1.05<br>[0.95, 1.15]     | 1.41 ***<br>[1.24, 1.61] | 1.23 ***<br>[1.11, 1.35] |
| Jewish                         | 1<br>[0.83, 1.21]        | 0.95<br>[0.77, 1.17]     | 0.84 *<br>[0.72, 0.98]   | 1.11<br>[0.9, 1.36]      | 0.92<br>[0.78, 1.08]     | 1.37 ***<br>[1.1, 1.69]  | 1.13<br>[0.96, 1.33]     |
| Mormon                         | 1.1<br>[0.86, 1.41]      | 1.19<br>[0.91, 1.56]     | 0.98<br>[0.79, 1.22]     | 0.94<br>[0.72, 1.22]     | 1.12<br>[0.89, 1.4]      | 1.11<br>[0.84, 1.47]     | 1.96 ***<br>[1.56, 2.46] |



|                             |                        |                        |                          |                          |                          |                          |                         |
|-----------------------------|------------------------|------------------------|--------------------------|--------------------------|--------------------------|--------------------------|-------------------------|
| Other religious affiliation | 1.06<br>[0.96, 1.17]   | 0.94<br>[0.84, 1.05]   | 0.94<br>[0.86, 1.02]     | 0.84 ***<br>[0.76, 0.94] | 1.03<br>[0.94, 1.13]     | 1.28 ***<br>[1.14, 1.45] | 1.13 **<br>[1.03, 1.24] |
| Protestant                  | 1.04<br>[0.93, 1.17]   | 0.87 *<br>[0.76, 0.99] | 0.98<br>[0.89, 1.08]     | 0.94<br>[0.83, 1.06]     | 0.99<br>[0.89, 1.1]      | 1.28 ***<br>[1.11, 1.46] | 1.2 ***<br>[1.08, 1.33] |
| 10                          | 0.94<br>[0.86, 1.03]   | 1.07<br>[0.97, 1.18]   | 0.83 ***<br>[0.77, 0.9]  | 1.14 **<br>[1.04, 1.25]  | 1.07 +<br>[0.99, 1.16]   | 0.97<br>[0.88, 1.07]     | 0.94<br>[0.86, 1.01]    |
| 6                           | 0.9 **<br>[0.82, 0.98] | 1<br>[0.9, 1.1]        | 0.84 ***<br>[0.78, 0.91] | 0.94<br>[0.86, 1.04]     | 0.84 ***<br>[0.77, 0.91] | 0.82 ***<br>[0.74, 0.9]  | 0.87 ***<br>[0.8, 0.94] |
| 7                           | 0.97<br>[0.89, 1.06]   | 1.02<br>[0.93, 1.13]   | 0.81 ***<br>[0.75, 0.88] | 0.95<br>[0.86, 1.04]     | 0.95<br>[0.88, 1.03]     | 1.01<br>[0.91, 1.11]     | 0.95<br>[0.88, 1.03]    |
| 8                           | 0.94<br>[0.85, 1.03]   | 0.99<br>[0.89, 1.11]   | 0.84 ***<br>[0.77, 0.92] | 0.99<br>[0.89, 1.1]      | 0.97<br>[0.89, 1.06]     | 1.01<br>[0.91, 1.12]     | 0.97<br>[0.89, 1.06]    |
| 9                           | 0.95<br>[0.87, 1.04]   | 1.03<br>[0.94, 1.14]   | 0.88 ***<br>[0.81, 0.95] | 1.17 ***<br>[1.06, 1.29] | 1.02<br>[0.94, 1.1]      | 1.02<br>[0.92, 1.12]     | 1<br>[0.92, 1.08]       |
